# Supplementary material for: Metal salts of fused triazole–triazine as promising energetic materials: crystal structures, energetic properties and high thermal stability
Source: Royal Society of Chemistry journal article supplement (doi:10.1039/d4nj02823f), 2024-01-01
Supplement: d4nj02823f1.pdf [file d4nj02823f1.pdf]

## Supporting Information

### **Metal salts of fused triazole-triazine as Promising energetic materials: Crystal Structures, Energetic Properties and high thermal stability**

Shichang Liu, Zhen Dong, and Zhiwen Ye \*

#### **Table of Contents**

1. General methods
2. X-ray crystallography details
3.  $^1\text{H}$  and  $^{13}\text{C}$ NMR spectra
4. IR spectra
5. Theoretical calculations
6. References

## General methods

In this work, all mentioned reagents were analytical grade and were used strictly in accordance with regulations.  $^1\text{H}$  and  $^{13}\text{C}$  NMR were recorded on a Bruker 500 MHz nuclear magnetic resonance spectrometer operating at 500 and 126 MHz, respectively. IR spectra were recorded using KBr pellets with a Thermo Nicolet iS10 spectrometer. Elemental analyses were carried out on a vario EL III CHNOS elemental analyzer. The decomposition temperature of compounds **4**, **5**, **6** and **7** were measured on a differential scanning calorimeter (Mettler Toledo DSC823e) at a scan rate of 5 K min<sup>-1</sup>. Densities were confirmed at room temperature by using the Micromeritics AccuPyc 1340 gas pycnometer. Impact and friction sensitivity were obtained using a standard BAM Fallhammer and a BAM friction tester.

## X-ray crystallography

Single-crystal X-ray diffraction analysis of **5**, **6** and **7** are carried out on a Bruker D8 QUEST diffractometer at 296(2) K. Data reduction and absorption corrections were performed with the SAINT and SADABS software packages,<sup>1</sup> respectively. The structures were solved by direct methods and refined by the full matrix least-squares based on  $F^2$  using SHELXL-2018 program package.<sup>2</sup> The non-hydrogen atoms were refined anisotropically. All hydrogen atoms were placed at the calculated positions and refined as riding on the parent atoms. The details of data collection, structure refinement and crystallography are summarized in Table S1.

**Table S1.** Crystal data and structure refinement for **5**, **6** and **7**.

| Compound                        | <b>5</b>                                                     | <b>6</b>                                                      | <b>7</b>                                                      |
|---------------------------------|--------------------------------------------------------------|---------------------------------------------------------------|---------------------------------------------------------------|
| Empirical formula               | C <sub>5</sub> HK <sub>2</sub> N <sub>9</sub> O <sub>6</sub> | C <sub>5</sub> HN <sub>9</sub> O <sub>6</sub> Rb <sub>2</sub> | C <sub>5</sub> H <sub>2</sub> CsN <sub>7</sub> O <sub>5</sub> |
| Formula weight                  | 361.35                                                       | 454.09                                                        | 373.05                                                        |
| Temperature                     | 296(2) K                                                     | 296(2) K                                                      | 296(2) K                                                      |
| Crystal system                  | Monoclinic                                                   | Monoclinic                                                    | Monoclinic                                                    |
| Space group                     | P21/c                                                        | P21/c                                                         | P21/c                                                         |
| a/Å                             | 11.4704(6) Å                                                 | 7.7439(10) Å                                                  | 8.9427(6) Å                                                   |
| b/Å                             | 14.0220(6) Å                                                 | 12.895(2) Å                                                   | 11.6294(7) Å                                                  |
| c/Å                             | 7.6750(3) Å                                                  | 12.8216(19) Å                                                 | 10.5630(7) Å                                                  |
| α/°                             | 90°.                                                         | 90°.                                                          | 90°.                                                          |
| β/°                             | 109.5380(10)°.                                               | 101.938(5)°.                                                  | 114.417(2)°.                                                  |
| γ/°                             | 90°.                                                         | 90°.                                                          | 90°.                                                          |
| Volume                          | 1163.35(9) Å <sup>3</sup>                                    | 1252.6(3) Å <sup>3</sup>                                      | 1000.28(11) Å <sup>3</sup>                                    |
| Z                               | 4                                                            | 4                                                             | 4                                                             |
| Density (calculated)            | 2.063 g/cm <sup>3</sup>                                      | 2.408 g/cm <sup>3</sup>                                       | 2.477 g/cm <sup>3</sup>                                       |
| F(000)                          | 720                                                          | 864                                                           | 704                                                           |
| Crystal size (mm <sup>3</sup> ) | 0.180 x 0.160 x 0.080                                        | 0.080 x 0.060 x 0.050                                         | 0.050 x 0.040 x 0.040                                         |
| Theta range for data collection | 2.905 to 27.515°                                             | 2.265 to 28.273°                                              | 2.501 to 28.336°                                              |
| Index ranges                    | -14<=h<=14, -<br>18<=k<=17,<br>-9<=l<=9                      | -10<=h<=9, -<br>17<=k<=12, -<br>16<=l<=17                     | -11<=h<=11,<br>-12<=k<=15,<br>-11<=l<=14                      |
| Reflections collected           | 11250                                                        | 12790                                                         | 10112                                                         |
| Max. and min. transmission      | 0.7456 and 0.6234                                            | 0.7456 and 0.5328                                             | 0.7456 and 0.6613                                             |

|                                   |                                                      |                                                      |                                                      |
|-----------------------------------|------------------------------------------------------|------------------------------------------------------|------------------------------------------------------|
| Data / restraints / parameters    | 2654 / 0 / 199                                       | 3072 / 0 / 199                                       | 2474 / 0 / 164                                       |
| Goodness-of-fit on F <sup>2</sup> | 1.048                                                | 1.021                                                | 1.041                                                |
| Final R indices<br>[I>2sigma(I)]  | R <sub>1</sub> = 0.0298,<br>wR <sub>2</sub> = 0.0734 | R <sub>1</sub> = 0.0323,<br>wR <sub>2</sub> = 0.0590 | R <sub>1</sub> = 0.0222,<br>wR <sub>2</sub> = 0.0445 |
| R indices (all data)              | R <sub>1</sub> = 0.0373,<br>wR <sub>2</sub> = 0.0770 | R <sub>1</sub> = 0.0574,<br>wR <sub>2</sub> = 0.0648 | R <sub>1</sub> = 0.0306,<br>wR <sub>2</sub> = 0.0468 |
| CCDC Number                       | 2210019                                              | 2335914                                              | 2335915                                              |

**Table S2.** Bond lengths [Å] for **5**.

|           |            |           |            |           |            |           |          |           |            |
|-----------|------------|-----------|------------|-----------|------------|-----------|----------|-----------|------------|
| K(1)-O(2) | 2.6979(12) | K(1)-N(3) | 3.1486(18) | K(2)-N(8) | 3.1382(15) | C(2)-N(4) | 1.338(2) | N(1)-N(2) | 1.3653(19) |
| K(1)-O(3) | 2.7432(13) | K(1)-N(7) | 3.2396(14) | K(2)-O(5) | 3.1477(16) | C(2)-N(1) | 1.369(2) | N(4)-N(5) | 1.317(2)   |
| K(1)-O(1) | 2.7680(12) | K(1)-N(3) | 3.3533(18) | K(2)-O(6) | 3.3937(19) | C(3)-N(5) | 1.350(2) | N(6)-O(2) | 1.2417(18) |
| K(1)-O(2) | 2.7864(13) | K(2)-O(1) | 2.7930(13) | K(2)-N(7) | 3.4546(14) | C(3)-C(4) | 1.415(2) | N(6)-O(1) | 1.2546(17) |
| K(1)-O(6) | 2.8472(15) | K(2)-N(2) | 2.8239(16) | K(2)-K(2) | 4.7336(10) | C(3)-C(5) | 1.470(2) | N(7)-O(4) | 1.2558(18) |
| K(1)-O(3) | 2.9301(13) | K(2)-O(6) | 2.9423(16) | C(1)-N(2) | 1.326(2)   | C(4)-N(8) | 1.348(2) | N(7)-O(3) | 1.2598(18) |
| K(1)-N(4) | 2.9553(15) | K(2)-O(3) | 2.9446(14) | C(1)-N(3) | 1.347(3)   | C(4)-N(1) | 1.370(2) | N(8)-N(9) | 1.346(2)   |
| K(1)-O(4) | 3.0940(13) | K(2)-O(4) | 3.0448(13) | C(1)-H(1) | 0.93       | C(5)-N(7) | 1.364(2) | N(9)-O(5) | 1.232(2)   |
| K(1)-N(6) | 3.1424(13) | K(2)-O(5) | 3.0707(14) | C(2)-N(3) | 1.335(2)   | C(5)-N(6) | 1.382(2) | N(9)-O(6) | 1.2388(19) |

**Table S3.** Bond lengths angles [°] for **5**.

|                |           |                |           |                |            |
|----------------|-----------|----------------|-----------|----------------|------------|
| O(2)-K(1)-O(3) | 73.77(4)  | O(6)-K(2)-O(3) | 61.86(4)  | N(5)-C(3)-C(5) | 111.80(13) |
| O(2)-K(1)-O(1) | 162.95(4) | O(1)-K(2)-O(4) | 67.95(4)  | C(4)-C(3)-C(5) | 124.80(13) |
| O(3)-K(1)-O(1) | 108.53(4) | N(2)-K(2)-O(4) | 66.01(4)  | N(8)-C(4)-N(1) | 112.54(14) |
| O(2)-K(1)-O(2) | 120.73(4) | O(6)-K(2)-O(4) | 66.39(4)  | N(8)-C(4)-C(3) | 135.63(14) |
| O(3)-K(1)-O(2) | 136.32(4) | O(3)-K(2)-O(4) | 121.65(4) | N(1)-C(4)-C(3) | 111.42(13) |
| O(1)-K(1)-O(2) | 45.84(3)  | O(1)-K(2)-O(5) | 73.50(4)  | N(7)-C(5)-N(6) | 120.82(14) |
| O(2)-K(1)-O(6) | 86.98(5)  | N(2)-K(2)-O(5) | 142.65(4) | N(7)-C(5)-C(3) | 120.75(13) |
| O(3)-K(1)-O(6) | 65.51(4)  | O(6)-K(2)-O(5) | 108.15(4) | N(6)-C(5)-C(3) | 117.94(13) |
| O(1)-K(1)-O(6) | 79.07(5)  | O(3)-K(2)-O(5) | 71.91(3)  | N(2)-N(1)-C(2) | 109.94(13) |
| O(2)-K(1)-O(6) | 73.97(4)  | O(4)-K(2)-O(5) | 101.67(4) | N(2)-N(1)-C(4) | 126.76(14) |
| O(2)-K(1)-O(3) | 53.79(3)  | O(1)-K(2)-N(8) | 112.54(4) | C(2)-N(1)-C(4) | 123.27(14) |
| O(3)-K(1)-O(3) | 122.54(4) | N(2)-K(2)-N(8) | 53.80(4)  | C(1)-N(2)-N(1) | 101.07(14) |
| O(1)-K(1)-O(3) | 115.36(3) | O(6)-K(2)-N(8) | 91.09(5)  | C(1)-N(2)-K(2) | 132.97(12) |
| O(2)-K(1)-O(3) | 69.63(3)  | O(3)-K(2)-N(8) | 95.50(4)  | N(1)-N(2)-K(2) | 123.26(10) |
| O(6)-K(1)-O(3) | 88.06(4)  | O(4)-K(2)-N(8) | 110.82(4) | C(2)-N(3)-C(1) | 102.20(15) |
| O(2)-K(1)-N(4) | 101.29(4) | O(5)-K(2)-N(8) | 146.87(4) | C(2)-N(3)-K(1) | 106.26(12) |
| O(3)-K(1)-N(4) | 73.24(4)  | O(1)-K(2)-O(5) | 66.94(3)  | C(1)-N(3)-K(1) | 108.89(13) |
| O(1)-K(1)-N(4) | 95.46(4)  | N(2)-K(2)-O(5) | 104.81(4) | C(2)-N(3)-K(1) | 84.64(11)  |
| O(2)-K(1)-N(4) | 132.39(4) | O(6)-K(2)-O(5) | 153.83(4) | C(1)-N(3)-K(1) | 165.56(14) |
| O(6)-K(1)-N(4) | 133.66(5) | O(3)-K(2)-O(5) | 92.08(3)  | K(1)-N(3)-K(1) | 80.81(4)   |
| O(3)-K(1)-N(4) | 133.38(4) | O(4)-K(2)-O(5) | 134.06(4) | N(5)-N(4)-C(2) | 116.39(14) |

|                |           |                |            |                |            |
|----------------|-----------|----------------|------------|----------------|------------|
| O(2)-K(1)-O(4) | 117.08(4) | O(5)-K(2)-O(5) | 57.14(4)   | N(5)-N(4)-K(1) | 139.06(11) |
| O(3)-K(1)-O(4) | 143.34(3) | N(8)-K(2)-O(5) | 94.05(4)   | C(2)-N(4)-K(1) | 102.15(10) |
| O(1)-K(1)-O(4) | 167.52(3) | O(1)-K(2)-O(6) | 69.83(4)   | N(4)-N(5)-C(3) | 122.84(14) |
| O(2)-K(1)-O(4) | 108.56(3) | N(2)-K(2)-O(6) | 124.31(4)  | O(2)-N(6)-O(1) | 120.14(13) |
| O(6)-K(1)-O(4) | 170.88(4) | O(6)-K(2)-O(6) | 83.58(5)   | O(2)-N(6)-C(5) | 123.33(13) |
| O(3)-K(1)-O(4) | 158.10(4) | O(3)-K(2)-O(6) | 84.37(4)   | O(1)-N(6)-C(5) | 116.51(13) |
| N(4)-K(1)-O(4) | 164.76(4) | O(4)-K(2)-O(6) | 64.55(3)   | O(2)-N(6)-K(1) | 62.09(8)   |
| O(2)-K(1)-N(6) | 143.89(4) | O(5)-K(2)-O(6) | 38.56(3)   | O(1)-N(6)-K(1) | 61.30(7)   |
| O(3)-K(1)-N(6) | 127.81(4) | N(8)-K(2)-O(6) | 174.03(4)  | C(5)-N(6)-K(1) | 162.63(10) |
| O(1)-K(1)-N(6) | 23.43(3)  | O(5)-K(2)-O(6) | 91.92(4)   | O(4)-N(7)-O(3) | 120.12(13) |
| O(2)-K(1)-N(6) | 23.19(3)  | O(1)-K(2)-N(7) | 25.67(4)   | O(4)-N(7)-C(5) | 117.18(13) |
| O(6)-K(1)-N(6) | 79.66(4)  | N(2)-K(2)-N(7) | 164.71(4)  | O(3)-N(7)-C(5) | 122.70(13) |
| O(3)-K(1)-N(6) | 92.08(3)  | O(6)-K(2)-N(7) | 68.54(3)   | O(4)-N(7)-K(1) | 72.11(8)   |
| N(4)-K(1)-N(6) | 112.23(4) | O(3)-K(2)-N(7) | 20.81(3)   | O(3)-N(7)-K(1) | 56.06(8)   |
| O(4)-K(1)-N(6) | 90.01(3)  | O(4)-K(2)-N(7) | 113.88(4)  | C(5)-N(7)-K(1) | 151.57(10) |
| O(2)-K(1)-N(3) | 119.34(4) | O(5)-K(2)-N(7) | 52.48(3)   | O(4)-N(7)-K(2) | 104.07(9)  |
| O(3)-K(1)-N(3) | 148.57(4) | N(8)-K(2)-N(7) | 115.81(4)  | O(3)-N(7)-K(2) | 56.13(8)   |
| O(1)-K(1)-N(3) | 67.80(4)  | O(5)-K(2)-N(7) | 86.20(3)   | C(5)-N(7)-K(2) | 108.98(9)  |
| O(2)-K(1)-N(3) | 64.80(4)  | O(6)-K(2)-N(7) | 64.68(3)   | K(1)-N(7)-K(2) | 93.19(3)   |
| O(6)-K(1)-N(3) | 138.22(4) | O(1)-K(2)-K(1) | 36.71(3)   | N(9)-N(8)-C(4) | 116.79(14) |
| O(3)-K(1)-N(3) | 84.04(4)  | N(2)-K(2)-K(1) | 86.01(3)   | N(9)-N(8)-K(2) | 114.13(10) |
| N(4)-K(1)-N(3) | 76.05(5)  | O(6)-K(2)-K(1) | 100.30(4)  | C(4)-N(8)-K(2) | 118.43(10) |
| O(4)-K(1)-N(3) | 115.56(4) | O(3)-K(2)-K(1) | 124.12(3)  | O(5)-N(9)-O(6) | 121.48(16) |
| N(6)-K(1)-N(3) | 59.79(4)  | O(4)-K(2)-K(1) | 44.02(3)   | O(5)-N(9)-N(8) | 122.38(14) |
| O(2)-K(1)-N(7) | 95.03(4)  | O(5)-K(2)-K(1) | 64.54(3)   | O(6)-N(9)-N(8) | 116.03(16) |
| O(3)-K(1)-N(7) | 22.40(3)  | N(8)-K(2)-K(1) | 139.58(3)  | N(6)-O(1)-K(1) | 95.28(8)   |
| O(1)-K(1)-N(7) | 90.21(3)  | O(5)-K(2)-K(1) | 92.30(3)   | N(6)-O(1)-K(2) | 119.20(9)  |
| O(2)-K(1)-N(7) | 128.90(4) | O(6)-K(2)-K(1) | 39.81(3)   | K(1)-O(1)-K(2) | 106.19(4)  |
| O(6)-K(1)-N(7) | 72.83(4)  | N(7)-K(2)-K(1) | 104.42(3)  | N(6)-O(2)-K(1) | 129.14(10) |
| O(3)-K(1)-N(7) | 144.82(4) | O(1)-K(2)-K(2) | 100.45(3)  | N(6)-O(2)-K(1) | 94.71(9)   |
| N(4)-K(1)-N(7) | 61.13(4)  | N(2)-K(2)-K(2) | 120.03(4)  | K(1)-O(2)-K(1) | 100.51(4)  |
| O(4)-K(1)-N(7) | 22.72(3)  | O(6)-K(2)-K(2) | 45.43(4)   | N(7)-O(3)-K(1) | 101.54(9)  |
| N(6)-K(1)-N(7) | 112.38(4) | O(3)-K(2)-K(2) | 68.69(3)   | N(7)-O(3)-K(1) | 125.78(10) |
| N(3)-K(1)-N(7) | 129.71(4) | O(4)-K(2)-K(2) | 56.15(3)   | K(1)-O(3)-K(1) | 95.98(4)   |
| O(2)-K(1)-N(3) | 62.64(4)  | O(5)-K(2)-K(2) | 68.47(3)   | N(7)-O(3)-K(2) | 103.06(9)  |
| O(3)-K(1)-N(3) | 83.17(4)  | N(8)-K(2)-K(2) | 136.45(3)  | K(1)-O(3)-K(2) | 117.57(4)  |
| O(1)-K(1)-N(3) | 134.03(4) | O(5)-K(2)-K(2) | 125.59(3)  | K(1)-O(3)-K(2) | 113.17(4)  |
| O(2)-K(1)-N(3) | 140.50(4) | O(6)-K(2)-K(2) | 38.15(3)   | N(7)-O(4)-K(2) | 142.06(10) |
| O(6)-K(1)-N(3) | 141.81(5) | N(7)-K(2)-K(2) | 57.73(2)   | N(7)-O(4)-K(1) | 85.17(9)   |
| O(3)-K(1)-N(3) | 91.28(4)  | K(1)-K(2)-K(2) | 63.92(12)  | K(2)-O(4)-K(1) | 92.83(3)   |
| N(4)-K(1)-N(3) | 44.15(4)  | N(2)-C(1)-N(3) | 17.23(16)  | N(9)-O(5)-K(2) | 104.34(11) |
| O(4)-K(1)-N(3) | 101.50(4) | N(2)-C(1)-H(1) | 121.4      | N(9)-O(5)-K(2) | 130.85(11) |
| N(6)-K(1)-N(3) | 138.50(4) | N(3)-C(1)-H(1) | 121.4      | K(2)-O(5)-K(2) | 122.86(4)  |
| N(3)-K(1)-N(3) | 79.48(4)  | N(3)-C(2)-N(4) | 127.76(15) | N(9)-O(6)-K(1) | 129.45(12) |

|                |           |                |            |                |            |
|----------------|-----------|----------------|------------|----------------|------------|
| N(7)-K(1)-N(3) | 86.61(4)  | N(3)-C(2)-N(1) | 109.55(15) | N(9)-O(6)-K(2) | 115.97(11) |
| O(1)-K(2)-N(2) | 69.20(4)  | N(4)-C(2)-N(1) | 122.68(15) | K(1)-O(6)-K(2) | 114.36(5)  |
| O(1)-K(2)-O(6) | 133.60(4) | N(3)-C(2)-K(1) | 72.99(10)  | N(9)-O(6)-K(2) | 88.44(11)  |
| N(2)-K(2)-O(6) | 98.92(5)  | N(4)-C(2)-K(1) | 55.84(8)   | K(1)-O(6)-K(2) | 90.44(4)   |
| O(1)-K(2)-O(3) | 145.34(4) | N(1)-C(2)-K(1) | 168.08(12) | K(2)-O(6)-K(2) | 96.42(5)   |
| N(2)-K(2)-O(3) | 145.19(4) | N(5)-C(3)-C(4) | 123.39(14) |                |            |

**Table S4.** Bond lengths [Å] for **6**.

|             |           |             |          |            |          |            |          |
|-------------|-----------|-------------|----------|------------|----------|------------|----------|
| Rb(1)-O(4)  | 2.879(2)  | Rb(2)-O(5)  | 2.937(2) | C(1)-N(1)  | 1.328(4) | C(5)-N(9)  | 1.380(3) |
| Rb(1)-O(5)  | 2.905(2)  | Rb(2)-O(4)  | 2.954(2) | C(1)-N(2)  | 1.347(4) | N(1)-N(3)  | 1.370(3) |
| Rb(1)-O(3)  | 2.963(2)  | Rb(2)-O(3)  | 2.964(2) | C(1)-H(2)  | 0.93     | N(5)-N(6)  | 1.335(3) |
| Rb(1)-O(2)  | 2.992(2)  | Rb(2)-N(1)  | 3.040(2) | C(2)-N(2)  | 1.327(4) | N(6)-O(1)  | 1.239(3) |
| Rb(1)-N(8)  | 3.023(2)  | Rb(2)-O(1)  | 3.046(2) | C(2)-N(7)  | 1.346(4) | N(6)-O(2)  | 1.244(3) |
| Rb(1)-O(1)  | 3.071(2)  | Rb(2)-N(5)  | 3.076(2) | C(2)-N(3)  | 1.379(3) | N(7)-N(8)  | 1.320(3) |
| Rb(1)-N(7)  | 3.219(3)  | Rb(2)-O(2)  | 3.092(2) | C(3)-N(5)  | 1.343(3) | N(9)-O(4)  | 1.235(3) |
| Rb(1)-N(2)  | 3.258(2)  | Rb(2)-O(6)  | 3.098(2) | C(3)-N(3)  | 1.362(3) | N(9)-O(3)  | 1.258(3) |
| Rb(1)-O(6)  | 3.345(2)  | Rb(2)-N(10) | 3.326(3) | C(3)-C(4)  | 1.418(4) | N(10)-O(5) | 1.242(3) |
| Rb(1)-N(9)  | 3.637(3)  | Rb(2)-N(9)  | 3.327(2) | C(4)-N(8)  | 1.354(3) | N(10)-O(6) | 1.260(3) |
| Rb(1)-Rb(2) | 4.5964(7) | Rb(2)-N(7)  | 3.398(3) | C(4)-C(5)  | 1.469(4) |            |          |
| Rb(1)-Rb(2) | 4.7255(6) | Rb(2)-N(6)  | 3.450(2) | C(5)-N(10) | 1.367(3) |            |          |

**Table S5.** Bond lengths angles [°] for **6**.

|                 |           |                 |           |                  |            |
|-----------------|-----------|-----------------|-----------|------------------|------------|
| O(4)-Rb(1)-O(5) | 52.34(6)  | O(5)-Rb(2)-O(1) | 92.68(6)  | N(8)-C(4)-C(3)   | 122.4(2)   |
| O(4)-Rb(1)-O(3) | 75.97(7)  | O(4)-Rb(2)-O(1) | 64.61(6)  | N(8)-C(4)-C(5)   | 112.1(2)   |
| O(5)-Rb(1)-O(3) | 89.27(7)  | O(3)-Rb(2)-O(1) | 100.92(6) | C(3)-C(4)-C(5)   | 125.5(2)   |
| O(4)-Rb(1)-O(2) | 122.16(6) | N(1)-Rb(2)-O(1) | 98.03(6)  | N(10)-C(5)-N(9)  | 120.7(2)   |
| O(5)-Rb(1)-O(2) | 74.59(6)  | O(5)-Rb(2)-N(5) | 88.35(7)  | N(10)-C(5)-C(4)  | 120.4(2)   |
| O(3)-Rb(1)-O(2) | 129.63(6) | O(4)-Rb(2)-N(5) | 136.16(7) | N(9)-C(5)-C(4)   | 118.8(2)   |
| O(4)-Rb(1)-N(8) | 84.44(7)  | O(3)-Rb(2)-N(5) | 107.54(6) | C(1)-N(1)-N(3)   | 101.0(2)   |
| O(5)-Rb(1)-N(8) | 112.92(7) | N(1)-Rb(2)-N(5) | 52.59(6)  | C(1)-N(1)-Rb(2)  | 137.91(18) |
| O(3)-Rb(1)-N(8) | 131.37(6) | O(1)-Rb(2)-N(5) | 150.52(6) | N(3)-N(1)-Rb(2)  | 120.41(15) |
| O(2)-Rb(1)-N(8) | 98.53(6)  | O(5)-Rb(2)-O(2) | 72.65(6)  | C(2)-N(2)-C(1)   | 102.1(2)   |
| O(4)-Rb(1)-O(1) | 65.15(6)  | O(4)-Rb(2)-O(2) | 105.66(6) | C(2)-N(2)-Rb(1)  | 153.47(18) |
| O(5)-Rb(1)-O(1) | 117.02(6) | O(3)-Rb(2)-O(2) | 139.76(6) | C(1)-N(2)-Rb(1)  | 103.40(18) |
| O(3)-Rb(1)-O(1) | 67.77(5)  | N(1)-Rb(2)-O(2) | 61.66(6)  | C(2)-N(2)-Rb(2)  | 76.91(16)  |
| O(2)-Rb(1)-O(1) | 161.02(6) | O(1)-Rb(2)-O(2) | 41.30(5)  | C(1)-N(2)-Rb(2)  | 119.5(2)   |
| N(8)-Rb(1)-O(1) | 63.60(6)  | N(5)-Rb(2)-O(2) | 112.20(6) | Rb(1)-N(2)-Rb(2) | 84.22(6)   |
| O(4)-Rb(1)-N(7) | 63.47(7)  | O(5)-Rb(2)-O(6) | 41.97(6)  | C(3)-N(3)-N(1)   | 126.5(2)   |
| O(5)-Rb(1)-N(7) | 89.67(7)  | O(4)-Rb(2)-O(6) | 102.59(6) | C(3)-N(3)-C(2)   | 124.2(2)   |
| O(3)-Rb(1)-N(7) | 128.70(6) | O(3)-Rb(2)-O(6) | 65.70(6)  | N(1)-N(3)-C(2)   | 109.3(2)   |
| O(2)-Rb(1)-N(7) | 99.16(6)  | N(1)-Rb(2)-O(6) | 114.32(6) | N(6)-N(5)-C(3)   | 117.4(2)   |

|                  |           |                  |           |                  |            |
|------------------|-----------|------------------|-----------|------------------|------------|
| N(8)-Rb(1)-N(7)  | 24.15(6)  | O(1)-Rb(2)-O(6)  | 117.28(6) | N(6)-N(5)-Rb(2)  | 114.06(15) |
| O(1)-Rb(1)-N(7)  | 67.40(6)  | N(5)-Rb(2)-O(6)  | 82.18(7)  | C(3)-N(5)-Rb(2)  | 126.80(17) |
| O(4)-Rb(1)-N(2)  | 141.04(7) | O(2)-Rb(2)-O(6)  | 113.43(6) | O(1)-N(6)-O(2)   | 121.4(2)   |
| O(5)-Rb(1)-N(2)  | 137.23(7) | O(5)-Rb(2)-N(10) | 21.76(6)  | O(1)-N(6)-N(5)   | 122.7(2)   |
| O(3)-Rb(1)-N(2)  | 67.65(6)  | O(4)-Rb(2)-N(10) | 120.61(7) | O(2)-N(6)-N(5)   | 115.9(2)   |
| O(2)-Rb(1)-N(2)  | 92.56(6)  | O(3)-Rb(2)-N(10) | 87.58(6)  | O(1)-N(6)-Rb(2)  | 60.89(13)  |
| N(8)-Rb(1)-N(2)  | 109.22(6) | N(1)-Rb(2)-N(10) | 95.72(6)  | O(2)-N(6)-Rb(2)  | 63.06(14)  |
| O(1)-Rb(1)-N(2)  | 87.93(6)  | O(1)-Rb(2)-N(10) | 110.93(6) | N(5)-N(6)-Rb(2)  | 166.63(18) |
| N(7)-Rb(1)-N(2)  | 132.99(6) | N(5)-Rb(2)-N(10) | 78.26(6)  | N(8)-N(7)-C(2)   | 116.6(2)   |
| O(4)-Rb(1)-O(6)  | 103.28(6) | O(2)-Rb(2)-N(10) | 94.34(6)  | N(8)-N(7)-Rb(1)  | 69.57(14)  |
| O(5)-Rb(1)-O(6)  | 65.17(6)  | O(6)-Rb(2)-N(10) | 22.27(5)  | C(2)-N(7)-Rb(1)  | 173.78(19) |
| O(3)-Rb(1)-O(6)  | 62.54(6)  | O(5)-Rb(2)-N(9)  | 119.07(7) | N(8)-N(7)-Rb(2)  | 112.11(18) |
| O(2)-Rb(1)-O(6)  | 67.41(6)  | O(4)-Rb(2)-N(9)  | 21.66(5)  | C(2)-N(7)-Rb(2)  | 84.41(17)  |
| N(8)-Rb(1)-O(6)  | 165.92(7) | O(3)-Rb(2)-N(9)  | 22.12(5)  | Rb(1)-N(7)-Rb(2) | 94.10(7)   |
| O(1)-Rb(1)-O(6)  | 130.28(6) | N(1)-Rb(2)-N(9)  | 153.91(7) | N(7)-N(8)-C(4)   | 123.5(2)   |
| N(7)-Rb(1)-O(6)  | 153.50(6) | O(1)-Rb(2)-N(9)  | 84.81(6)  | N(7)-N(8)-Rb(1)  | 86.28(15)  |
| N(2)-Rb(1)-O(6)  | 72.20(6)  | N(5)-Rb(2)-N(9)  | 120.11(6) | C(4)-N(8)-Rb(1)  | 150.01(18) |
| O(4)-Rb(1)-N(9)  | 60.38(7)  | O(2)-Rb(2)-N(9)  | 126.09(6) | O(4)-N(9)-O(3)   | 120.3(2)   |
| O(5)-Rb(1)-N(9)  | 86.95(6)  | O(6)-Rb(2)-N(9)  | 86.53(6)  | O(4)-N(9)-C(5)   | 123.1(2)   |
| O(3)-Rb(1)-N(9)  | 18.62(5)  | N(10)-Rb(2)-N(9) | 107.54(6) | O(3)-N(9)-C(5)   | 116.6(2)   |
| O(2)-Rb(1)-N(9)  | 145.20(5) | O(5)-Rb(2)-N(7)  | 153.91(6) | O(4)-N(9)-Rb(2)  | 61.96(14)  |
| N(8)-Rb(1)-N(9)  | 115.93(6) | O(4)-Rb(2)-N(7)  | 60.44(6)  | O(3)-N(9)-Rb(2)  | 62.53(13)  |
| O(1)-Rb(1)-N(9)  | 53.55(5)  | O(3)-Rb(2)-N(7)  | 95.29(6)  | C(5)-N(9)-Rb(2)  | 158.73(19) |
| N(7)-Rb(1)-N(9)  | 110.17(6) | N(1)-Rb(2)-N(7)  | 82.82(6)  | O(4)-N(9)-Rb(1)  | 108.80(19) |
| N(2)-Rb(1)-N(9)  | 81.15(6)  | O(1)-Rb(2)-N(7)  | 65.35(6)  | O(3)-N(9)-Rb(1)  | 48.77(14)  |
| O(6)-Rb(1)-N(9)  | 78.14(6)  | N(5)-Rb(2)-N(7)  | 103.89(6) | C(5)-N(9)-Rb(1)  | 108.13(17) |
| O(4)-Rb(1)-Rb(2) | 165.75(6) | O(2)-Rb(2)-N(7)  | 81.36(6)  | Rb(2)-N(9)-Rb(1) | 87.23(6)   |
| O(5)-Rb(1)-Rb(2) | 127.72(5) | O(6)-Rb(2)-N(7)  | 160.97(6) | O(5)-N(10)-O(6)  | 119.9(2)   |
| O(3)-Rb(1)-Rb(2) | 117.69(4) | N(10)-Rb(2)-N(7) | 175.65(6) | O(5)-N(10)-C(5)  | 123.5(2)   |
| O(2)-Rb(1)-Rb(2) | 53.48(4)  | N(9)-Rb(2)-N(7)  | 74.79(6)  | O(6)-N(10)-C(5)  | 116.5(2)   |
| N(8)-Rb(1)-Rb(2) | 83.08(5)  | O(5)-Rb(2)-N(6)  | 79.37(6)  | O(5)-N(10)-Rb(2) | 61.21(15)  |
| O(1)-Rb(1)-Rb(2) | 114.61(4) | O(4)-Rb(2)-N(6)  | 85.40(6)  | O(6)-N(10)-Rb(2) | 68.65(15)  |
| N(7)-Rb(1)-Rb(2) | 102.81(5) | O(3)-Rb(2)-N(6)  | 119.35(6) | C(5)-N(10)-Rb(2) | 148.53(18) |
| N(2)-Rb(1)-Rb(2) | 50.93(5)  | N(1)-Rb(2)-N(6)  | 81.38(6)  | N(6)-O(1)-Rb(2)  | 98.30(15)  |

|                   |            |                  |            |                  |            |
|-------------------|------------|------------------|------------|------------------|------------|
| O(6)-Rb(1)-Rb(2)  | 87.62(4)   | O(1)-Rb(2)-N(6)  | 20.81(5)   | N(6)-O(1)-Rb(1)  | 147.26(18) |
| N(9)-Rb(1)-Rb(2)  | 132.04(4)  | N(5)-Rb(2)-N(6)  | 133.04(6)  | Rb(2)-O(1)-Rb(1) | 104.75(6)  |
| O(4)-Rb(1)-Rb(2)  | 82.85(5)   | O(2)-Rb(2)-N(6)  | 21.02(5)   | N(6)-O(2)-Rb(1)  | 116.27(17) |
| O(5)-Rb(1)-Rb(2)  | 36.24(5)   | O(6)-Rb(2)-N(6)  | 113.84(6)  | N(6)-O(2)-Rb(2)  | 95.92(16)  |
| O(3)-Rb(1)-Rb(2)  | 118.41(4)  | N(10)-Rb(2)-N(6) | 100.31(6)  | Rb(1)-O(2)-Rb(2) | 101.91(7)  |
| O(2)-Rb(1)-Rb(2)  | 39.81(4)   | N(9)-Rb(2)-N(6)  | 105.23(6)  | N(9)-O(3)-Rb(1)  | 112.61(17) |
| N(8)-Rb(1)-Rb(2)  | 102.29(5)  | N(7)-Rb(2)-N(6)  | 75.44(6)   | N(9)-O(3)-Rb(2)  | 95.36(14)  |
| O(1)-Rb(1)-Rb(2)  | 145.44(4)  | N(1)-C(1)-N(2)   | 117.5(3)   | Rb(1)-O(3)-Rb(2) | 108.44(7)  |
| N(7)-Rb(1)-Rb(2)  | 87.36(5)   | N(1)-C(1)-H(2)   | 121.2      | N(9)-O(4)-Rb(1)  | 150.50(17) |
| N(2)-Rb(1)-Rb(2)  | 126.47(5)  | N(2)-C(1)-H(2)   | 121.2      | N(9)-O(4)-Rb(2)  | 96.38(16)  |
| O(6)-Rb(1)-Rb(2)  | 67.59(4)   | N(2)-C(2)-N(7)   | 128.6(2)   | Rb(1)-O(4)-Rb(2) | 112.28(7)  |
| N(9)-Rb(1)-Rb(2)  | 121.59(4)  | N(2)-C(2)-N(3)   | 110.1(2)   | N(10)-O(5)-Rb(1) | 149.38(17) |
| Rb(2)-Rb(1)-Rb(2) | 93.108(11) | N(7)-C(2)-N(3)   | 121.3(3)   | N(10)-O(5)-Rb(2) | 97.03(16)  |
| O(5)-Rb(2)-O(4)   | 124.37(8)  | N(2)-C(2)-Rb(2)  | 81.63(16)  | Rb(1)-O(5)-Rb(2) | 107.99(7)  |
| O(5)-Rb(2)-O(3)   | 102.96(6)  | N(7)-C(2)-Rb(2)  | 73.29(17)  | N(10)-O(6)-Rb(2) | 89.08(16)  |
| O(4)-Rb(2)-O(3)   | 42.86(6)   | N(3)-C(2)-Rb(2)  | 118.94(18) | N(10)-O(6)-Rb(1) | 133.08(19) |
| O(5)-Rb(2)-N(1)   | 86.81(7)   | N(5)-C(3)-N(3)   | 113.2(2)   | Rb(2)-O(6)-Rb(1) | 96.47(6)   |
| O(4)-Rb(2)-N(1)   | 143.05(7)  | N(5)-C(3)-C(4)   | 134.4(2)   |                  |            |
| O(3)-Rb(2)-N(1)   | 158.16(7)  | N(3)-C(3)-C(4)   | 111.8(2)   |                  |            |

**Table S6.** Bond lengths [Å] for **7**.

|            |            |            |          |           |          |           |          |
|------------|------------|------------|----------|-----------|----------|-----------|----------|
| Cs(1)-O(3) | 3.097(2)   | Cs(1)-N(2) | 3.540(2) | C(2)-N(4) | 1.342(3) | C(5)-N(7) | 1.380(3) |
| Cs(1)-O(1) | 3.1007(18) | Cs(1)-O(2) | 3.556(2) | C(2)-N(3) | 1.355(3) | N(1)-N(3) | 1.378(3) |
| Cs(1)-N(1) | 3.110(2)   | Cs(1)-N(6) | 3.559(2) | C(3)-O(5) | 1.206(3) | N(4)-N(5) | 1.348(3) |
| Cs(1)-O(4) | 3.138(2)   | Cs(1)-N(6) | 3.591(2) | C(3)-N(3) | 1.398(3) | N(4)-H(4) | 0.86     |
| Cs(1)-O(5) | 3.2810(17) | C(1)-N(1)  | 1.311(3) | C(3)-C(4) | 1.481(3) | N(6)-O(2) | 1.241(3) |
| Cs(1)-O(1) | 3.382(2)   | C(1)-N(2)  | 1.366(3) | C(4)-N(5) | 1.293(3) | N(6)-O(1) | 1.264(3) |
| Cs(1)-O(2) | 3.436(2)   | C(1)-H(1)  | 0.93     | C(4)-C(5) | 1.471(3) | N(7)-O(3) | 1.242(3) |
| Cs(1)-N(5) | 3.474(2)   | C(2)-N(2)  | 1.321(3) | C(5)-N(6) | 1.367(3) | N(7)-O(4) | 1.247(3) |

**Table S7.** Bond lengths angles [°] for **7**.

|                 |           |                 |           |                 |            |
|-----------------|-----------|-----------------|-----------|-----------------|------------|
| O(3)-Cs(1)-O(1) | 123.18(5) | O(2)-Cs(1)-O(2) | 83.40(5)  | C(1)-N(1)-N(3)  | 101.50(18) |
| O(3)-Cs(1)-N(1) | 104.43(6) | N(5)-Cs(1)-O(2) | 132.71(5) | C(1)-N(1)-Cs(1) | 125.30(16) |
| O(1)-Cs(1)-N(1) | 120.75(5) | N(2)-Cs(1)-O(2) | 108.16(5) | N(3)-N(1)-Cs(1) | 124.83(14) |
| O(3)-Cs(1)-O(4) | 62.60(6)  | O(3)-Cs(1)-N(6) | 110.21(5) | C(2)-N(2)-C(1)  | 101.47(19) |
| O(1)-Cs(1)-O(4) | 73.75(6)  | O(1)-Cs(1)-N(6) | 20.43(4)  | C(2)-N(2)-Cs(1) | 140.75(16) |
| N(1)-Cs(1)-O(4) | 104.19(5) | N(1)-Cs(1)-N(6) | 140.54(5) | C(1)-N(2)-Cs(1) | 88.88(13)  |
| O(3)-Cs(1)-O(5) | 102.61(5) | O(4)-Cs(1)-N(6) | 76.62(5)  | C(2)-N(3)-N(1)  | 108.98(18) |
| O(1)-Cs(1)-O(5) | 125.94(5) | O(5)-Cs(1)-N(6) | 122.60(5) | C(2)-N(3)-C(3)  | 124.84(19) |
| N(1)-Cs(1)-O(5) | 65.03(5)  | O(1)-Cs(1)-N(6) | 74.71(4)  | N(1)-N(3)-C(3)  | 125.75(19) |

|                 |           |                 |            |                  |            |
|-----------------|-----------|-----------------|------------|------------------|------------|
| O(4)-Cs(1)-O(5) | 160.13(5) | O(2)-Cs(1)-N(6) | 20.34(4)   | C(2)-N(4)-N(5)   | 121.94(19) |
| O(3)-Cs(1)-O(1) | 146.68(5) | N(5)-Cs(1)-N(6) | 52.11(5)   | C(2)-N(4)-Cs(1)  | 128.22(16) |
| O(1)-Cs(1)-O(1) | 72.78(5)  | N(2)-Cs(1)-N(6) | 76.35(5)   | N(5)-N(4)-Cs(1)  | 69.46(12)  |
| N(1)-Cs(1)-O(1) | 86.69(5)  | O(2)-Cs(1)-N(6) | 80.68(5)   | C(2)-N(4)-H(4)   | 119.03(19) |
| O(4)-Cs(1)-O(1) | 145.69(5) | O(3)-Cs(1)-N(6) | 156.50(5)  | N(5)-N(4)-H(4)   | 119.03(19) |
| O(5)-Cs(1)-O(1) | 53.34(4)  | O(1)-Cs(1)-N(6) | 77.67(5)   | Cs(1)-N(4)-H(4)  | 74         |
| O(3)-Cs(1)-O(2) | 107.49(5) | N(1)-Cs(1)-N(6) | 67.79(5)   | C(4)-N(5)-N(4)   | 119.03(19) |
| O(1)-Cs(1)-O(2) | 38.35(5)  | O(4)-Cs(1)-N(6) | 139.95(5)  | C(4)-N(5)-Cs(1)  | 121.17(15) |
| N(1)-Cs(1)-O(2) | 148.01(5) | O(5)-Cs(1)-N(6) | 53.89(4)   | N(4)-N(5)-Cs(1)  | 89.23(13)  |
| O(4)-Cs(1)-O(2) | 92.33(5)  | O(1)-Cs(1)-N(6) | 20.61(4)   | O(2)-N(6)-O(1)   | 120.0(2)   |
| O(5)-Cs(1)-O(2) | 105.35(4) | O(2)-Cs(1)-N(6) | 81.87(5)   | O(2)-N(6)-C(5)   | 124.5(2)   |
| O(1)-Cs(1)-O(2) | 65.30(4)  | N(5)-Cs(1)-N(6) | 135.58(5)  | O(1)-N(6)-C(5)   | 115.5(2)   |
| O(3)-Cs(1)-N(5) | 58.11(5)  | N(2)-Cs(1)-N(6) | 91.09(5)   | O(2)-N(6)-Cs(1)  | 74.22(14)  |
| O(1)-Cs(1)-N(5) | 67.02(5)  | O(2)-Cs(1)-N(6) | 19.99(4)   | O(1)-N(6)-Cs(1)  | 58.88(12)  |
| N(1)-Cs(1)-N(5) | 154.77(5) | N(6)-Cs(1)-N(6) | 86.19(5)   | C(5)-N(6)-Cs(1)  | 141.71(15) |
| O(4)-Cs(1)-N(5) | 52.78(5)  | N(1)-C(1)-N(2)  | 116.9(2)   | O(2)-N(6)-Cs(1)  | 78.42(13)  |
| O(5)-Cs(1)-N(5) | 132.75(4) | N(1)-C(1)-Cs(1) | 144.55(17) | O(1)-N(6)-Cs(1)  | 70.34(13)  |
| O(1)-Cs(1)-N(5) | 118.03(5) | N(2)-C(1)-Cs(1) | 69.88(13)  | C(5)-N(6)-Cs(1)  | 121.10(14) |
| O(2)-Cs(1)-N(5) | 53.72(5)  | N(1)-C(1)-H(1)  | 121.6      | Cs(1)-N(6)-Cs(1) | 93.81(5)   |
| O(3)-Cs(1)-N(2) | 77.27(5)  | N(2)-C(1)-H(1)  | 121.6      | O(3)-N(7)-O(4)   | 121.1(2)   |
| O(1)-Cs(1)-N(2) | 95.14(5)  | Cs(1)-C(1)-H(1) | 63.3       | O(3)-N(7)-C(5)   | 121.2(2)   |
| N(1)-Cs(1)-N(2) | 130.64(5) | N(2)-C(2)-N(4)  | 130.0(2)   | O(4)-N(7)-C(5)   | 117.7(2)   |
| O(4)-Cs(1)-N(2) | 118.65(5) | N(2)-C(2)-N(3)  | 111.2(2)   | N(6)-O(1)-Cs(1)  | 100.69(13) |
| O(5)-Cs(1)-N(2) | 66.54(5)  | N(4)-C(2)-N(3)  | 118.83(19) | N(6)-O(1)-Cs(1)  | 89.05(14)  |
| O(1)-Cs(1)-N(2) | 71.93(4)  | O(5)-C(3)-N(3)  | 122.3(2)   | Cs(1)-O(1)-Cs(1) | 107.22(5)  |
| O(2)-Cs(1)-N(2) | 56.82(5)  | O(5)-C(3)-C(4)  | 128.0(2)   | N(6)-O(2)-Cs(1)  | 85.43(15)  |
| N(5)-Cs(1)-N(2) | 67.12(5)  | N(3)-C(3)-C(4)  | 109.69(19) | N(6)-O(2)-Cs(1)  | 81.59(13)  |
| O(3)-Cs(1)-O(2) | 168.93(5) | N(5)-C(4)-C(5)  | 117.7(2)   | Cs(1)-O(2)-Cs(1) | 96.60(5)   |
| O(1)-Cs(1)-O(2) | 66.69(5)  | N(5)-C(4)-C(3)  | 125.3(2)   | N(7)-O(3)-Cs(1)  | 123.13(16) |
| N(1)-Cs(1)-O(2) | 64.63(5)  | C(5)-C(4)-C(3)  | 116.9(2)   | N(7)-O(4)-Cs(1)  | 139.73(17) |
| O(4)-Cs(1)-O(2) | 120.15(5) | N(6)-C(5)-N(7)  | 122.0(2)   | C(3)-O(5)-Cs(1)  | 140.40(15) |
| O(5)-Cs(1)-O(2) | 71.83(4)  | N(6)-C(5)-C(4)  | 117.3(2)   | C(3)-O(5)-Cs(1)  | 110.71(14) |
| O(1)-Cs(1)-O(2) | 36.34(4)  | N(7)-C(5)-C(4)  | 120.7(2)   | Cs(1)-O(5)-Cs(1) | 106.18(4)  |



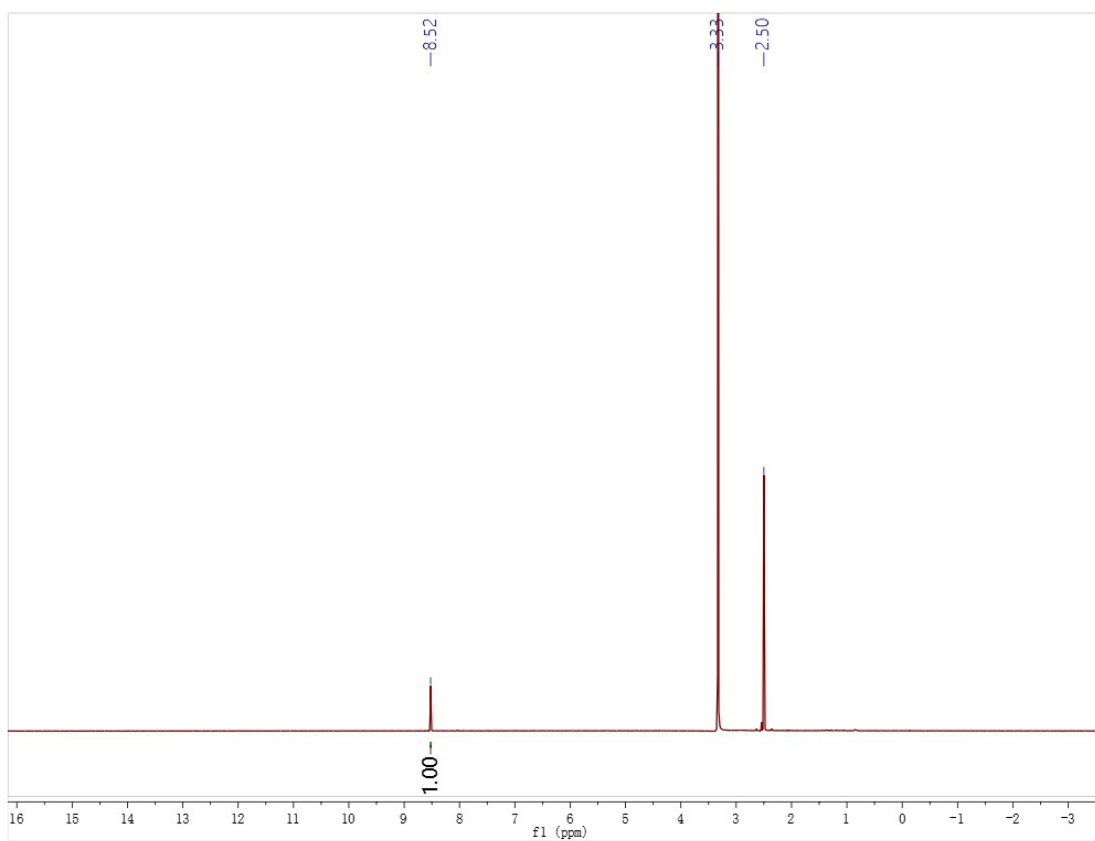

**Figure S1** <sup>1</sup>H NMR spectra for **4**

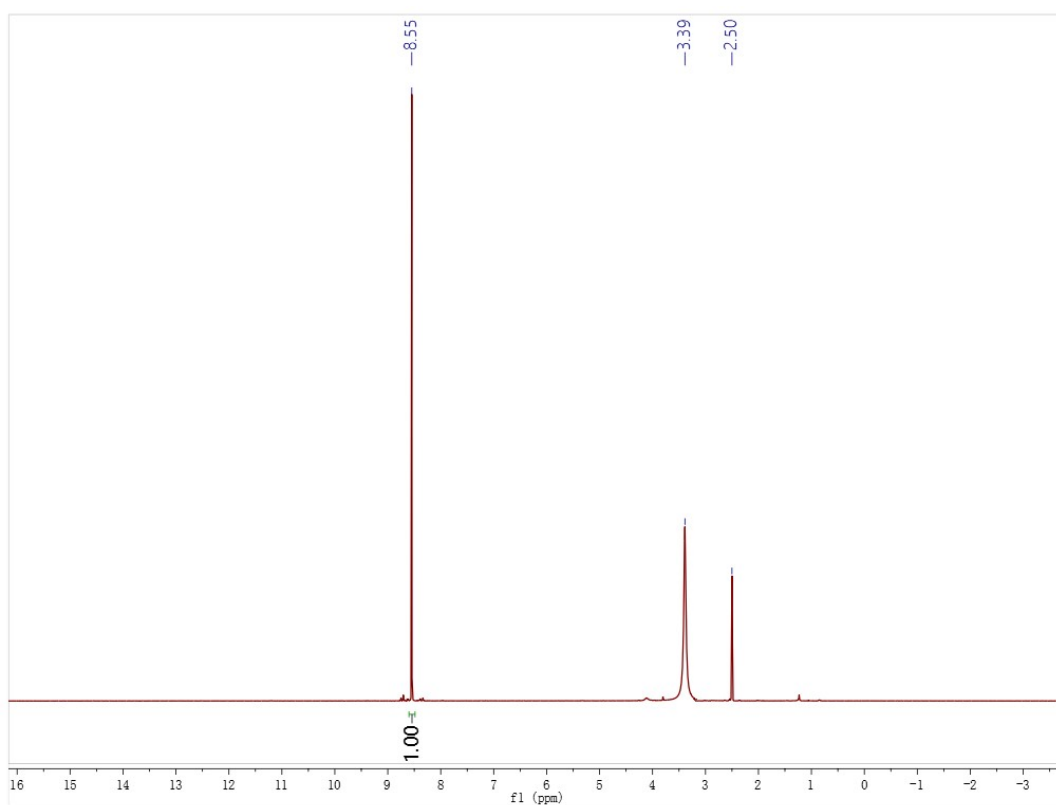

**Figure S2** <sup>1</sup>H NMR spectra for **5**

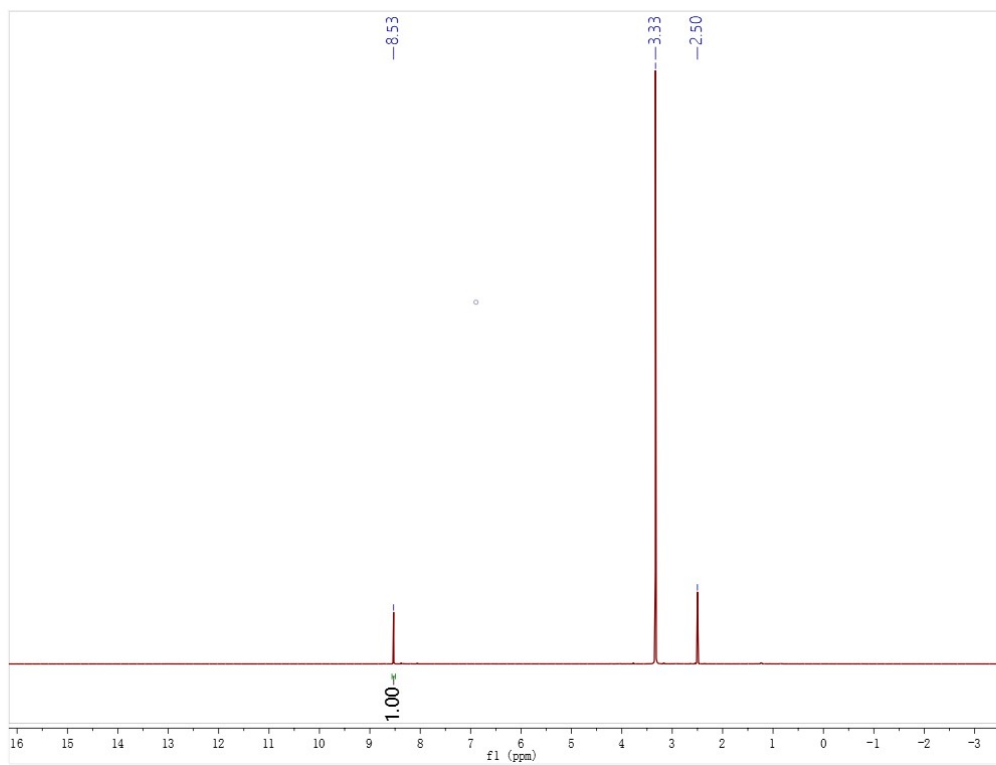

Figure S3 <sup>1</sup>H NMR spectra for 6

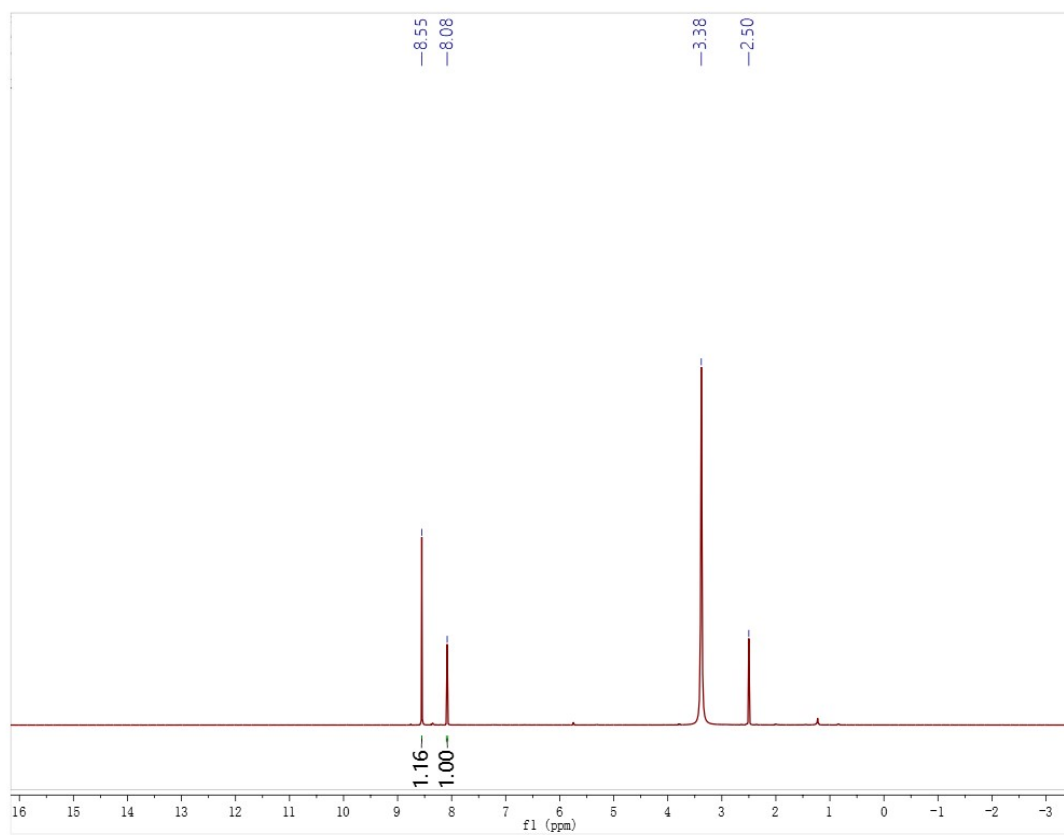

Figure S4 <sup>1</sup>H NMR spectra for 7

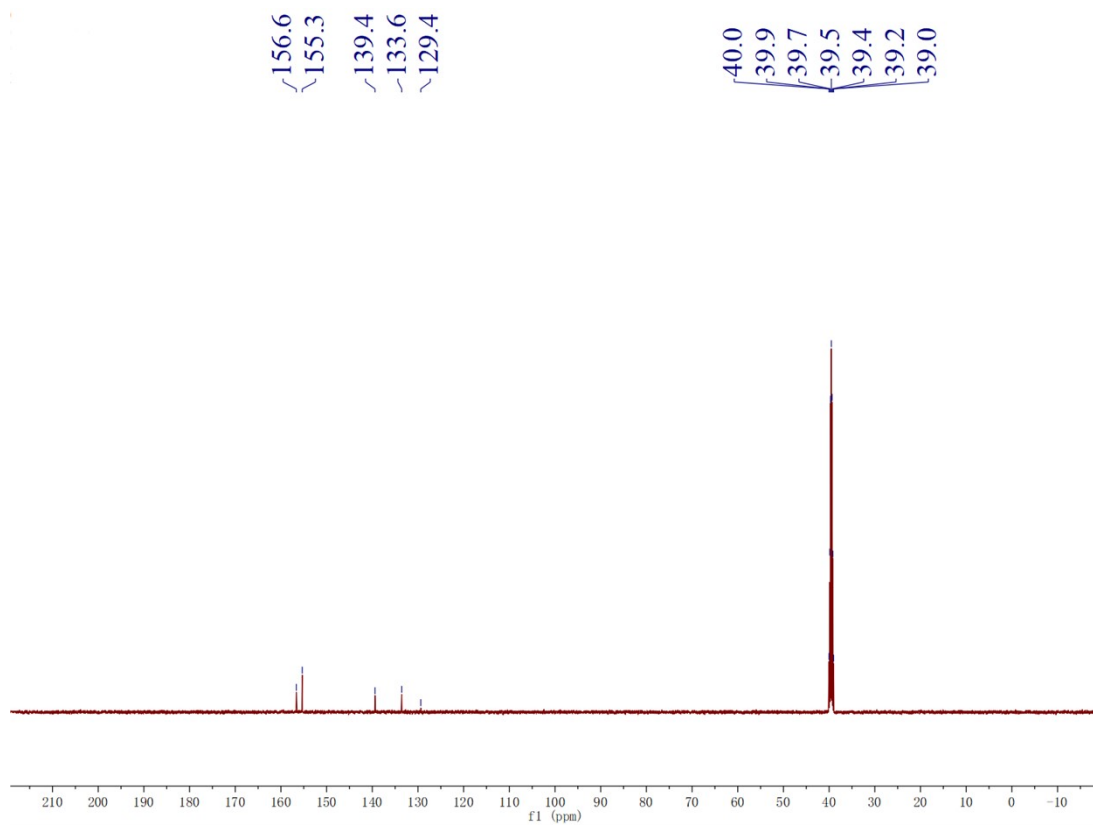

Figure S5  $^{13}\text{C}$  NMR spectra for 4.

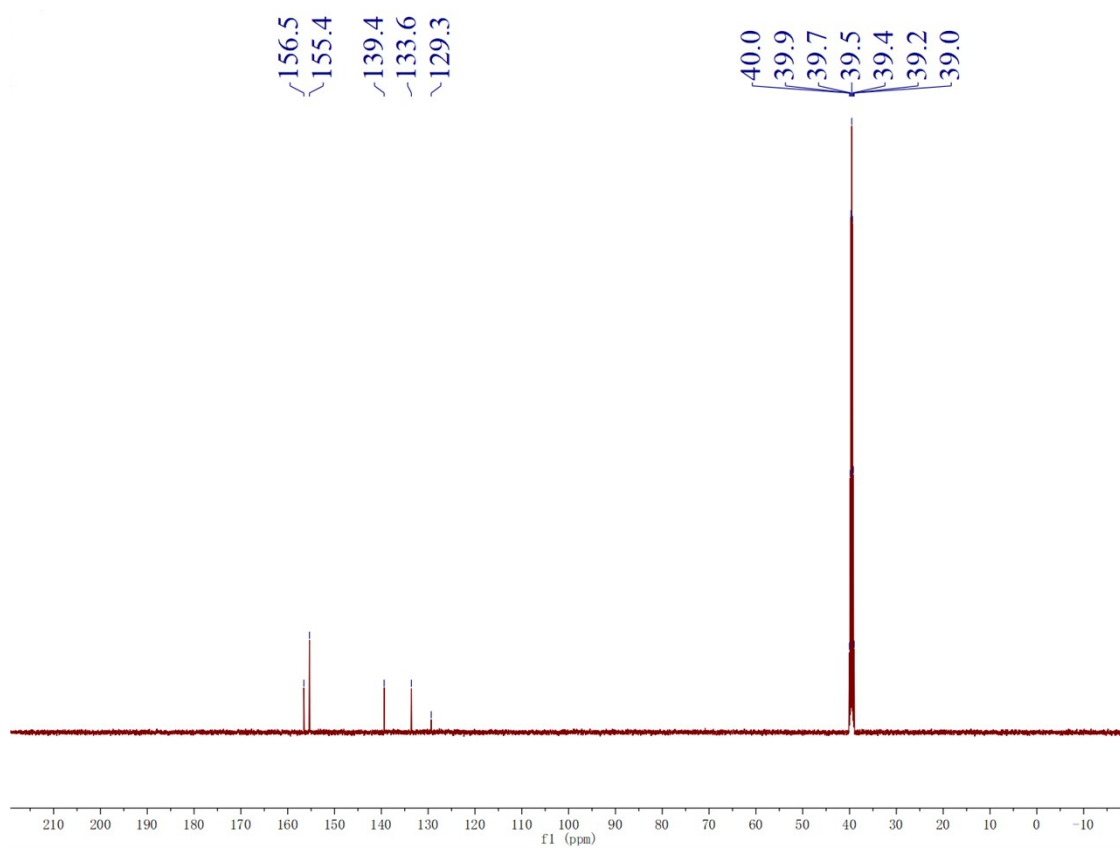

Figure S6  $^{13}\text{C}$  NMR spectra for 5.

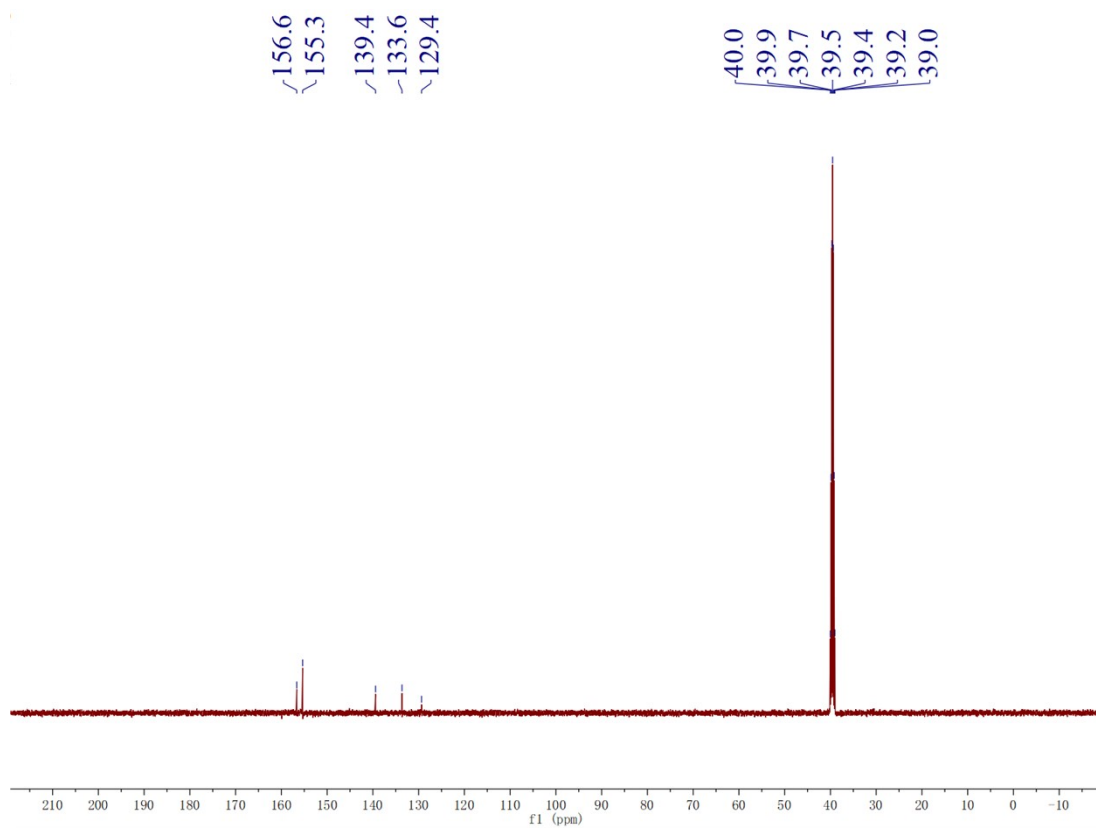

Figure S7  $^{13}\text{C}$  NMR spectra for 6.

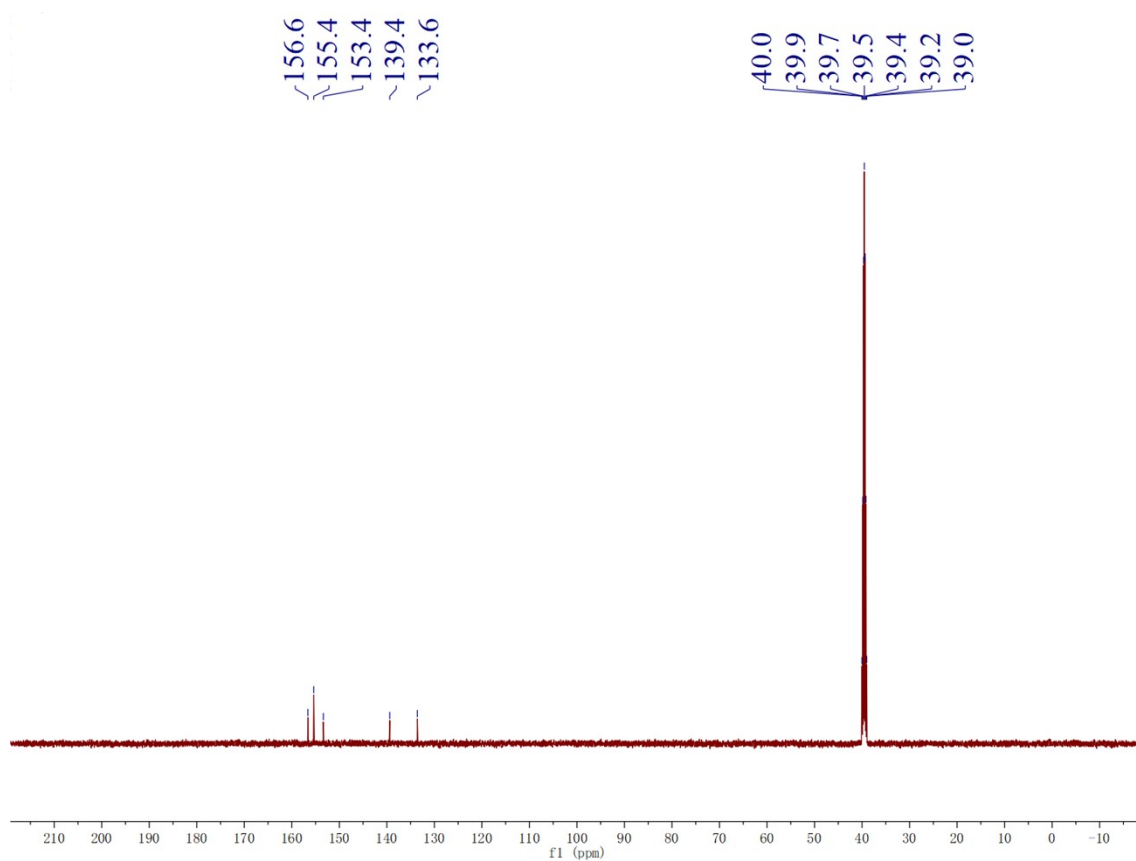

Figure S8  $^{13}\text{C}$  NMR spectra for 7.

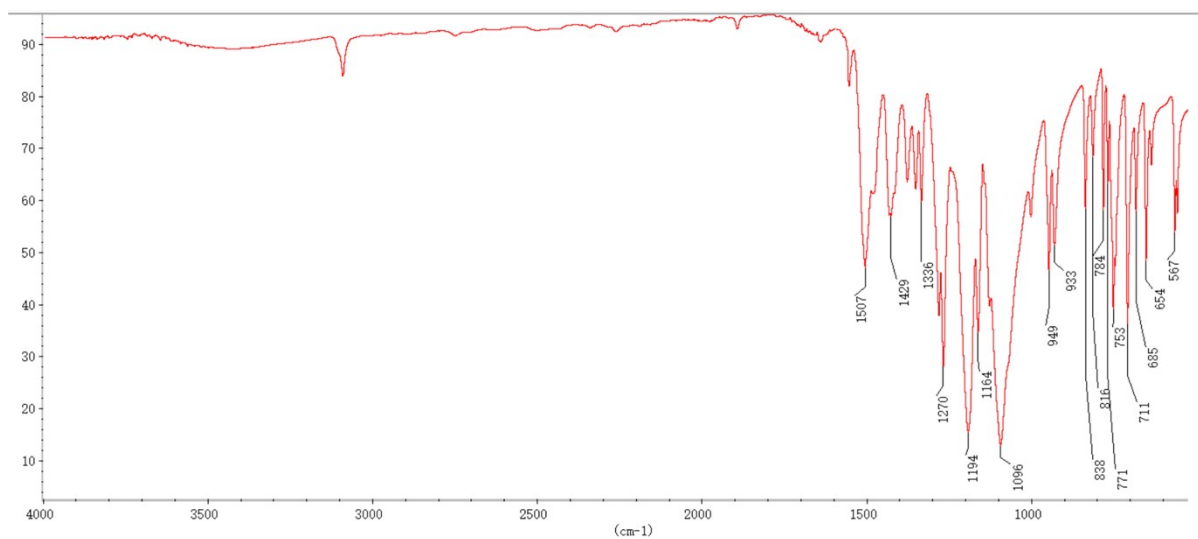

Figure S9 IR spectra for 4.

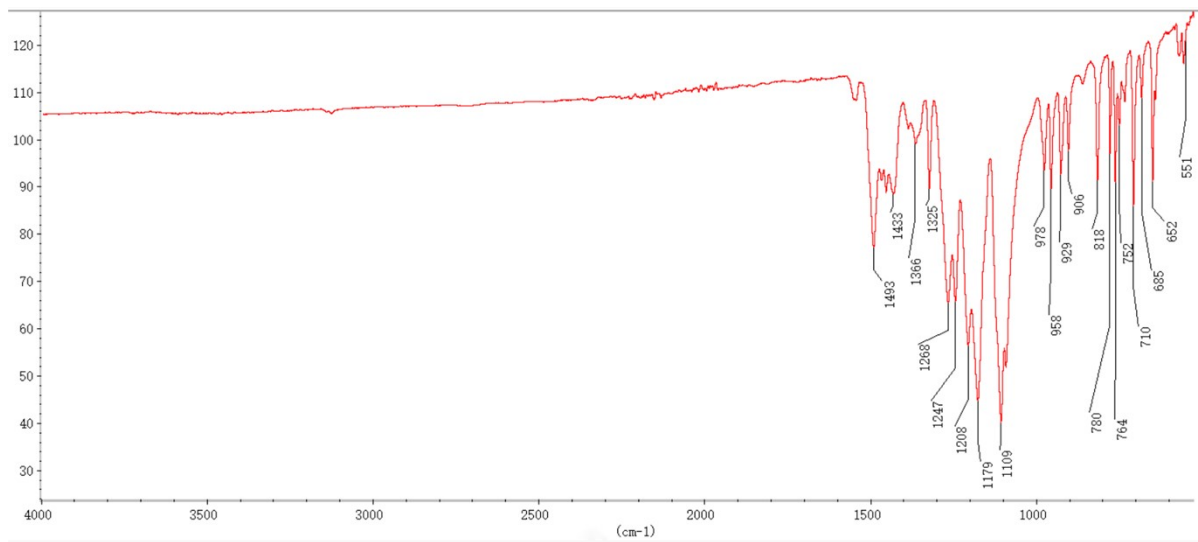

Figure S10 IR spectra for 5.

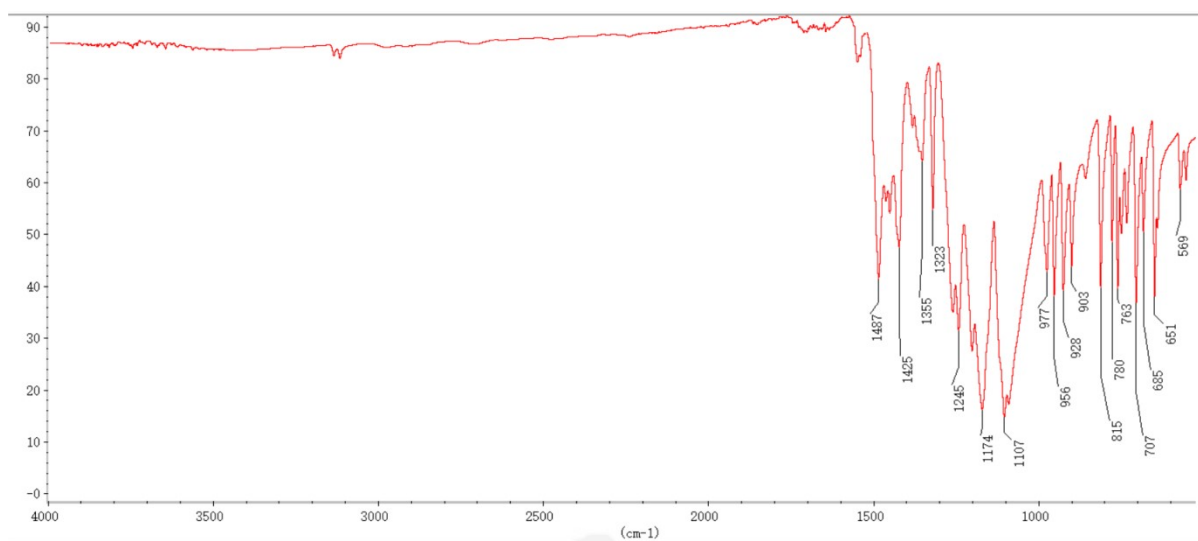

Figure S11 IR spectra for 6.

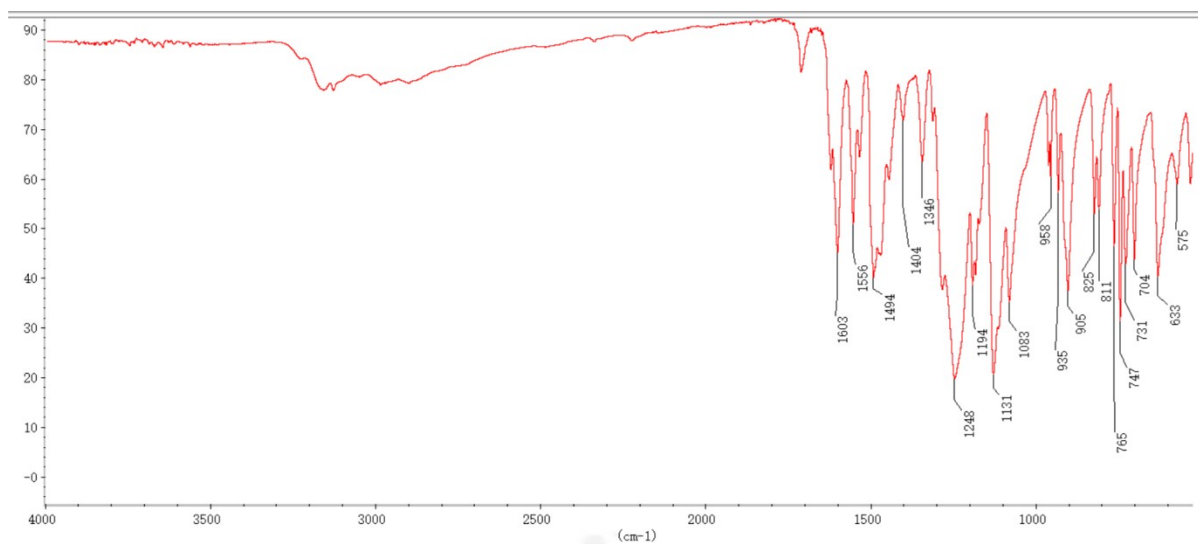

**Figure S12** IR spectra for **7**.

### Theoretical calculation

As one of the most significant parameters, heat of formation (HOF) has a remarkable impact on energetic compounds. As a common and useful means, computation methods have been used in calculation HOF. In this work, the predictions of HOF of compounds used isodesmic reactions by Gaussian 09.<sup>3</sup> The heats of formation for  $\text{CH}_4$ ,  $\text{NH}_3$ ,  $\text{NH}_2\text{CH}_3$ ,  $\text{NH}_2\text{NO}_2$ , triazole, [1,2,4]triazolo[5,1-c][1,2,4]triazine and [1,2,4]triazolo[5,1-c][1,2,4]triazin-4(1H)-one, were obtained from literature.<sup>4</sup> The geometric optimization and frequency analyses of the structures are based on available single-crystal structures and using the B3LYP<sup>5</sup> functional with the 6-311++G(d, p) basis set.<sup>6</sup> The geometrical were optimized with no constraints imposed under default convergence criteria. Total energy ( $E_0$ ) and zero-point energy (ZPE) were calculated with vibrational frequency analysis.

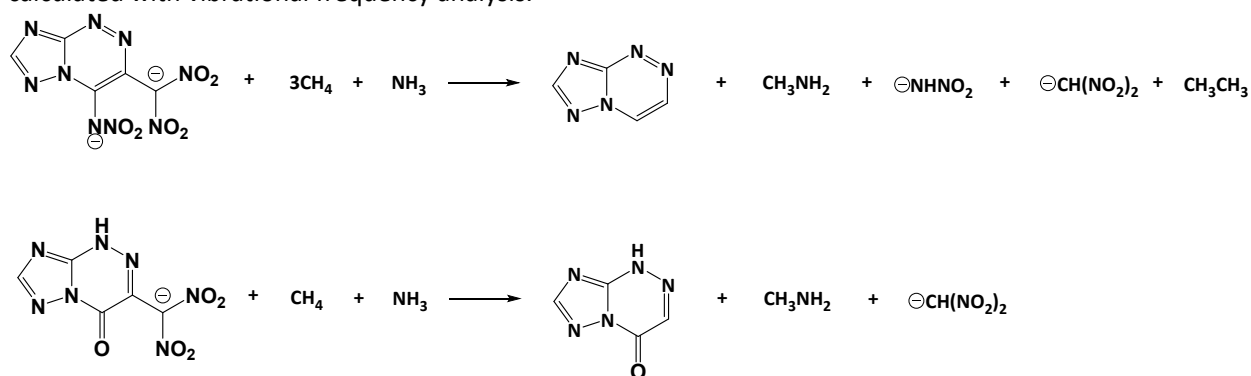

**Figure S13** Isodesmic reactions for calculating heats of formation.

For energetic salts, the solid-phase heat of formation is calculated based on a Born-Haber energy cycle (Figure S14).<sup>7</sup> The number is simplified by equation 1:

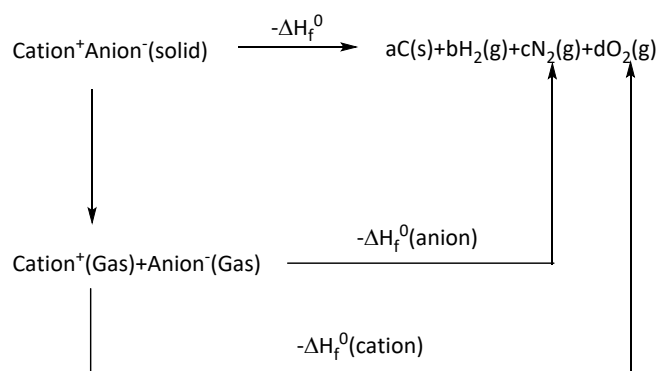

**Figure S14** Born-Haber Cycle for the formation of energetic salts.

$$\Delta H_f^0 (\text{salt, 298 K}) = \Delta H_f^0 (\text{cation, 298K}) + \Delta H_f^0 (\text{anion, 298K}) - \Delta H_L \quad (1)$$

where  $\Delta H_L$  is the lattice energy of the salts, which could be predicted by using the formula suggested by Jenkins et al. [Eq. (2)]

$$\Delta H_L = U_{\text{POT}} + [\rho(n_M/2 - 2) + q(n_X/2 - 2)]RT \quad (2)$$

where  $n_M$  and  $n_X$  depend on the nature of the ions,  $M^{q+}$  and  $X^{p-}$ , and are equal to 3 for monatomic ions, 5 for linear polyatomic ions, and 6 for nonlinear polyatomic ions.

The equation for lattice potential energy  $U_{\text{POT}}$  [Eq. (3)] has the form:

$$U_{\text{POT}} [\text{kJ mol}^{-1}] = \gamma(\rho_m/M_m)^{1/3} + \delta \quad (3)$$

where  $\rho_m$  [ $\text{g cm}^{-3}$ ] is the density of the salt,  $M_m$  is the chemical formula mass of the ionic material, and the coefficients  $\gamma$  ( $\text{kJ mol}^{-1} \text{ cm}$ ) and  $\delta$  ( $\text{kJ mol}^{-1}$ ) are assigned literature values.<sup>7</sup>

**Table S8** DSC of compound **4** and **6**.

| Compound | $T_p$ (5 k/min)/°C | $T_p$ (10 k/min)/°C | $T_p$ (20 k/min)/°C |
|----------|--------------------|---------------------|---------------------|
| <b>4</b> | 271.93             | 282.53              | 294.14              |
| <b>6</b> | 279.59             | 288.22              | 297.28              |

**Table S9** DSC of compound **5** and **7**.

| Compound | $T_p$ (5 k/min)/°C | $T_p$ (7.5 k/min)/°C | $T_p$ (10 k/min)/°C |
|----------|--------------------|----------------------|---------------------|
| <b>5</b> | 278.48             | 285.53               | 289.4               |
| <b>7</b> | 263.93             | 268.37               | 272.7               |

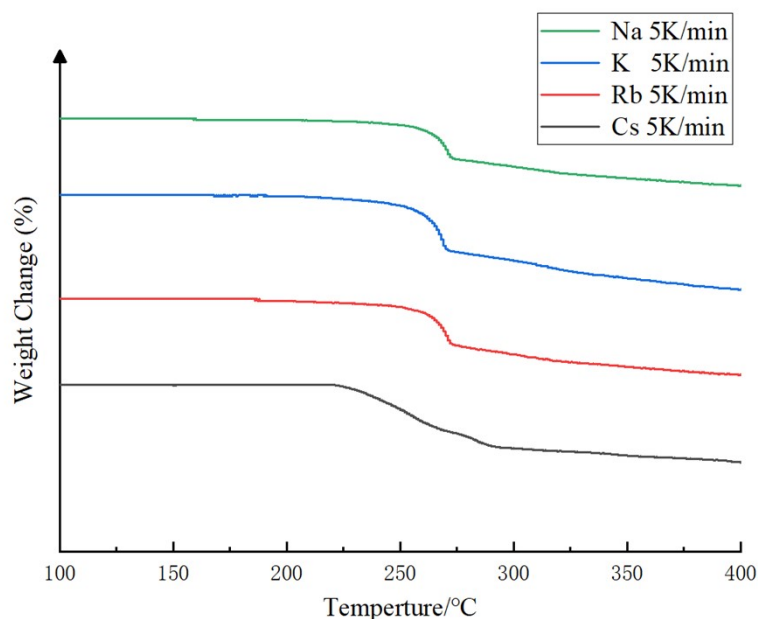

**Figure S15** The DSC curve of different metal salts with heating rates of 5 K/min.

## References

- [1] Bruker, *APEX2*, Bruker AXS Inc., Madison, Wisconsin, USA, 2005.
- [2] G. M. Sheldrick. *Acta Cryst.*, **2015**, C71:3-8.
- [3] M. J. Frisch, G. W. Trucks, H. B. Schlegel, G. E. Scuseria, M. A. Robb, J. R. Cheeseman, V. G. Zakrzewski, J. A. Montgomery, R. E. Stratmann, J. C. Burant, S. Dapprich, J. M. Millam, A. D. Daniels, K. N. Kudin, M. C. Strain, O. Farkas, J. Tomasi, V. Barone, M. Cossi, R. Cammi, B. Mennucci, C. Pomelli, C. Adamo, S. Clifford, J. Ochterski, G. A. Petersson, P. Y. Ayala, Q. Cui, K. Morokuma, D. K. Malick, A. D. Rabuck, K. Raghavachari, J. B. Foresman, J. Cioslowski, J. V. Ortiz, A. G. Baboul, B. B. Stefanov, G. Liu, A. Liashenko, P. Piskorz, I. Komaromi, R. Gomperts, R. L. Martin, D. J. Fox, T. Keith, M. A. Laham, C. Y. Peng, A. Nanayakkara, C. Gonzalez, M. Challacombe, P. M. W. Gill, B. Johnson, W. Chen, M. W. Wong, J. L. Andres, C. Gonzalez, M. Head-Gordon, E. S. Replogle, J. A. Pople, *Gaussian 09, revision A. 01*, Gaussian, Inc., Wallingford, CT, **2009**.
- [4] a) H. Gao, Y. H. Joo, D. A. Parrish, T. Vo, J. M. Shreeve, *Chem. Eur. J.*, **2011**, *17*, 4613–4618. b) H. Gao, C. Ye, C. M. Piekarski, J. M. Shreeve, *J. Phys. Chem. C.*, **2007**, *111*, 10718–10731. c) Q. Yu, G. Cheng, X. Ju, C. Lu, H. Yang, *New J. Chem.*, **2017**, *41*, 4797–4801. d) B. Wu, Z. Wang, H. Yang, Q. Lin, X. Ju, C. Lu, G. Cheng, *RSC Adv.*, **2014**, *4*, 58243–58251.
- [5] a) A. D. Becke, *J. Chem. Phys.*, **1993**, *98*, 5648–5652; b) P. J. Stephens, F. J. Devlin, C. F. Chabalowski, M. J. Frisch, *J. Phys. Chem.*, **1994**, *98*, 11623–11627.
- [6] P. C. Hariharan and J. A. Pople, *Chim. Acta.*, **1973**, *28*, 213–222.
- [7] H. D. B. Jenkins, D. Tudela, L. Glasser, *Inorg. Chem.*, **2002**, *41*, 2364-2367.
- [8] Dong Z, Zhang G, Liu Y. *J. Mol. Struct.*, **2023**, 1283: 135274.
